# Supplementary material for: Dynamic covalent bonding for directed construction of molecular cages toward carbon dioxide reduction
Source: Royal Society of Chemistry journal article supplement (doi:10.1039/d4qi01043d), 2024-01-01
Supplement: d4qi01043d1.pdf [file d4qi01043d1.pdf]

## Electronic Supplementary Information

### **Dynamic covalent bonding for directed construction of molecular cages toward carbon dioxide reduction**

Jingting He,<sup>†a</sup> Man Dong,<sup>†b</sup> Yang Zhao,<sup>b</sup> Dongxu Cui,<sup>b</sup> Xiaohui Yao,<sup>b</sup> Fanfei Meng,<sup>a</sup>  
Wei Li,<sup>b</sup> Shuai Yang,<sup>b</sup> Chunyi Sun,<sup>\*b</sup> and Zhongmin Su<sup>\*a</sup>

<sup>a</sup>School of Materials Science and Engineering, Changchun University of Science and Technology, Changchun, 130022 Jilin, China. E-mail: [zmsu@nenu.edu.cn](mailto:zmsu@nenu.edu.cn)

<sup>b</sup>Key Laboratory of Polyoxometalate Science of Ministry of Education, Northeast Normal University, Changchun, 130024 Jilin, China. E-mail: [suncy009@nenu.edu.cn](mailto:suncy009@nenu.edu.cn)

\*Corresponding author: e-mail: [zmsu@nenu.edu.cn](mailto:zmsu@nenu.edu.cn); [suncy009@nenu.edu.cn](mailto:suncy009@nenu.edu.cn)

**Table S1** Crystallographic data of Zr-CHO and Schiff-base ZrOC-1

| Compound                            | Zr-CHO                                                            | Schiff-base ZrOC-1                                                                             |
|-------------------------------------|-------------------------------------------------------------------|------------------------------------------------------------------------------------------------|
| Empirical formula                   | C <sub>43</sub> H <sub>40</sub> ClO <sub>14</sub> Zr <sub>3</sub> | C <sub>78</sub> H <sub>66</sub> Cl <sub>2</sub> N <sub>6</sub> O <sub>22</sub> Zr <sub>6</sub> |
| Formula weight                      | 1089.86                                                           | 2057.58                                                                                        |
| Crystal system                      | triclinic                                                         | monoclinic                                                                                     |
| Space group                         | P-1                                                               | C2/c                                                                                           |
| Temperature (K)                     | 293(2)                                                            | 173                                                                                            |
| Wavelength (Å)                      |                                                                   |                                                                                                |
| a (Å)                               | 10.4744(4)                                                        | 45.504(9)                                                                                      |
| b (Å)                               | 10.9063(4)                                                        | 17.800(3)                                                                                      |
| c (Å)                               | 21.5947(8)                                                        | 15.373(3)                                                                                      |
| α (°)                               | 83.359(2)                                                         | 90                                                                                             |
| γ (°)                               | 72.183(2)                                                         | 90                                                                                             |
| Volume (Å <sup>3</sup> )            | 2331.37(15)                                                       | 12265(4)                                                                                       |
| Z                                   | 2                                                                 | 4                                                                                              |
| ρ <sub>calc</sub> g/cm <sup>3</sup> | 1.553                                                             | 1.114                                                                                          |
| μ/mm <sup>-1</sup>                  | 6.459                                                             | 4.861                                                                                          |
| F (000)                             | 1094                                                              | 4104                                                                                           |
| 2θ range (°)                        | 4.122 to 125.276                                                  | 5.342 to 76.16                                                                                 |
| Reflections collected               | 56280                                                             | 25401                                                                                          |
| Independent reflections             | 7324 [R <sub>int</sub> = 0.0608,<br>R <sub>sigma</sub> = 0.0435]  | 3250[R <sub>int</sub> =0.0983,<br>R <sub>sigma</sub> = 0.0608]                                 |
| Goodness-of-fit on F <sup>2</sup>   | 1.077                                                             | 1.053                                                                                          |
| Final R indexes [I>=2σ (I)]         | R <sub>1</sub> = 0.0667,<br>wR <sub>2</sub> = 0.1729              | R <sub>1</sub> = 0.1154,<br>wR <sub>2</sub> = 0.2962                                           |
| Final R indexes [all data]          | R <sub>1</sub> = 0.0900,<br>wR <sub>2</sub> = 0.1879              | R <sub>1</sub> = 0.1364,<br>wR <sub>2</sub> = 0.3153                                           |

$${}^a R_1 = \sum ||F_o| - |F_c|| / \sum |F_o|; {}^b wR_2 = \{ \sum [w(F_o^2 - F_c^2)^2] / \sum [w(F_o^2)^2] \}^{1/2}$$

**Table S2** Bond length of Zr-CHO

| Atom | Atom | Length/Å   | Atom | Atom | Length/Å  |
|------|------|------------|------|------|-----------|
| Zr01 | Zr02 | 3.3407(10) | C00I | C00J | 1.488(13) |
| Zr01 | Zr03 | 3.3508(10) | C00J | C00Q | 1.369(16) |
| Zr01 | O005 | 2.123(5)   | C00J | C00V | 1.393(16) |
| Zr01 | O006 | 2.077(5)   | C00K | C00O | 1.380(15) |
| Zr01 | O007 | 2.121(5)   | C00K | C00S | 1.419(15) |
| Zr01 | O008 | 2.173(6)   | C00L | C00T | 1.390(17) |
| Zr01 | O00A | 2.208(6)   | C00L | C017 | 1.392(17) |
| Zr01 | C00K | 2.534(10)  | C00M | C01E | 1.511(19) |
| Zr01 | C00O | 2.526(10)  | C00O | C00U | 1.368(15) |
| Zr01 | C00R | 2.555(10)  | C00Q | C019 | 1.363(15) |
| Zr01 | C00S | 2.525(10)  | C00R | C00S | 1.383(15) |
| Zr01 | C00U | 2.530(10)  | C00R | C00U | 1.359(15) |
| Zr02 | Zr03 | 3.3466(11) | C00T | C01B | 1.387(16) |
| Zr02 | O006 | 2.063(5)   | C00V | C015 | 1.376(15) |
| Zr02 | O007 | 2.115(5)   | C00W | C010 | 1.375(18) |
| Zr02 | O009 | 2.126(6)   | C00W | C012 | 1.358(18) |
| Zr02 | O00C | 2.190(6)   | C00Y | C00Z | 1.353(18) |
| Zr02 | O00D | 2.220(6)   | C00Y | C012 | 1.333(17) |
| Zr02 | C013 | 2.523(13)  | C00Z | C010 | 1.455(18) |
| Zr02 | C014 | 2.517(11)  | C011 | C015 | 1.380(17) |
| Zr02 | C016 | 2.543(12)  | C011 | C019 | 1.350(17) |
| Zr02 | C018 | 2.532(12)  | C011 | C01F | 1.534(13) |
| Zr02 | C01C | 2.530(13)  | C013 | C014 | 1.37(2)   |
| Zr03 | O005 | 2.127(5)   | C013 | C01C | 1.34(2)   |
| Zr03 | O006 | 2.075(5)   | C014 | C018 | 1.43(2)   |
| Zr03 | O009 | 2.113(6)   | C016 | C018 | 1.359(19) |
| Zr03 | O00B | 2.194(6)   | C016 | C01C | 1.28(2)   |
| Zr03 | O00E | 2.208(6)   | C017 | C01D | 1.378(16) |
| Zr03 | C00W | 2.530(11)  | C01A | C01B | 1.336(19) |
| Zr03 | C00Y | 2.531(11)  | C01A | C01D | 1.390(19) |
| Zr03 | C00Z | 2.517(11)  | C01A | C01M | 1.518(17) |
| Zr03 | C010 | 2.526(12)  | C01E | C01G | 1.41(2)   |
| Zr03 | C012 | 2.541(11)  | C01E | C01J | 1.49(3)   |
| O008 | C00H | 1.263(13)  | C01F | O01K | 1.214(14) |
| O00A | C00I | 1.261(12)  | C01F | O2   | 1.222(16) |
| O00B | C00I | 1.262(12)  | C01G | C01N | 1.41(2)   |
| O00C | C00M | 1.261(16)  | O01H | C01M | 1.21(3)   |
| O00D | C00H | 1.255(12)  | C01I | C01L | 1.33(2)   |
| O00E | C00M | 1.242(16)  | C01I | C01N | 1.38(2)   |
| C00F | C00N | 1.300(13)  | C01I | C9   | 1.549(14) |
| C00F | C00P | 1.439(13)  | C01J | C01L | 1.45(2)   |
| C00F | C00X | 1.423(13)  | C01M | O11  | 1.241(18) |

---

|      |      |           |    |     |           |
|------|------|-----------|----|-----|-----------|
| O00G | C00N | 1.248(12) | O3 | C9  | 1.197(13) |
| C00H | C00L | 1.486(14) | C9 | O40 | 1.168(16) |

---

**Table S3** Bond length of Schiff-base ZrOC-1

| Atom | Atom | Length/Å° | Atom | Atom | Length/Å° |
|------|------|-----------|------|------|-----------|
| Zr1  | Zr2  | 3.356(4)  | N2   | C19  | 1.214(10) |
| Zr1  | Zr3  | 3.359(4)  | N3   | C29  | 1.28(3)   |
| Zr1  | O1   | 2.10(2)   | C0AA | C17  | 1.456(14) |
| Zr1  | O3   | 2.05(2)   | C2AA | C3   | 1.455(19) |
| Zr1  | O4   | 2.108(19) | C6   | C26  | 1.31(4)   |
| Zr1  | O71  | 2.25(2)   | C6   | C28  | 1.32(4)   |
| Zr1  | O9   | 2.274(18) | C7   | C9   | 1.35(4)   |
| Zr1  | C7   | 2.50(3)   | C7   | C18  | 1.39(4)   |
| Zr1  | C8   | 2.58(3)   | C8   | C18  | 1.35(4)   |
| Zr1  | C9   | 2.50(3)   | C8   | C37  | 1.34(4)   |
| Zr1  | C18  | 2.53(3)   | C9   | C37  | 1.39(4)   |
| Zr1  | C37  | 2.54(3)   | C10  | C12  | 1.43(4)   |
| Zr2  | Zr3  | 3.351(4)  | C10  | C26  | 1.39(4)   |
| Zr2  | O21  | 2.18(2)   | C12  | C28  | 1.34(4)   |
| Zr2  | O3   | 2.07(2)   | C14  | C20  | 1.42(4)   |
| Zr2  | O4   | 2.140(19) | C14  | C30  | 1.36(4)   |
| Zr2  | O8   | 2.14(2)   | C15  | C31  | 1.39      |
| Zr2  | O11  | 2.10(2)   | C15  | C35  | 1.39      |
| Zr2  | C6   | 2.49(3)   | C31  | C2   | 1.39      |
| Zr2  | C10  | 2.50(3)   | C31  | C19  | 1.444(9)  |
| Zr2  | C12  | 2.51(3)   | C2   | C33  | 1.39      |
| Zr2  | C26  | 2.53(3)   | C33  | C17  | 1.39      |
| Zr2  | C28  | 2.55(3)   | C17  | C35  | 1.39      |
| Zr3  | O1   | 2.120(19) | C16  | C20  | 1.36(4)   |
| Zr3  | O3   | 2.10(2)   | C16  | C24  | 1.42(4)   |
| Zr3  | O6   | 2.21(2)   | C21  | C1AA | 1.39      |
| Zr3  | O10  | 2.225(18) | C21  | C13  | 1.39      |
| Zr3  | O11  | 2.12(2)   | C21  | C27  | 1.465(19) |
| Zr3  | C14  | 2.54(3)   | C1AA | C23  | 1.39      |
| Zr3  | C16  | 2.51(3)   | C23  | C3   | 1.39      |
| Zr3  | C20  | 2.51(3)   | C3   | C25  | 1.39      |
| Zr3  | C24  | 2.49(3)   | C25  | C13  | 1.39      |
| Zr3  | C30  | 2.53(3)   | C22  | C38  | 1.470(19) |
| O2   | C22  | 1.252(16) | C24  | C30  | 1.39(4)   |
| O6   | C2AA | 1.265(16) | C29  | C32  | 1.465(19) |
| O7   | C22  | 1.249(16) | C32  | C34  | 1.39      |
| O8   | C2AA | 1.247(16) | C32  | C5   | 1.39      |
| O9   | C0AA | 1.257(16) | C34  | C36  | 1.39      |
| O10  | C0AA | 1.241(16) | C36  | C38  | 1.39      |
| N1   | N3   | 1.40(3)   | C38  | C39  | 1.39      |
| N1   | C27  | 1.21(3)   | C39  | C5   | 1.39      |
| N2   | N21  | 1.460(11) |      |      |           |

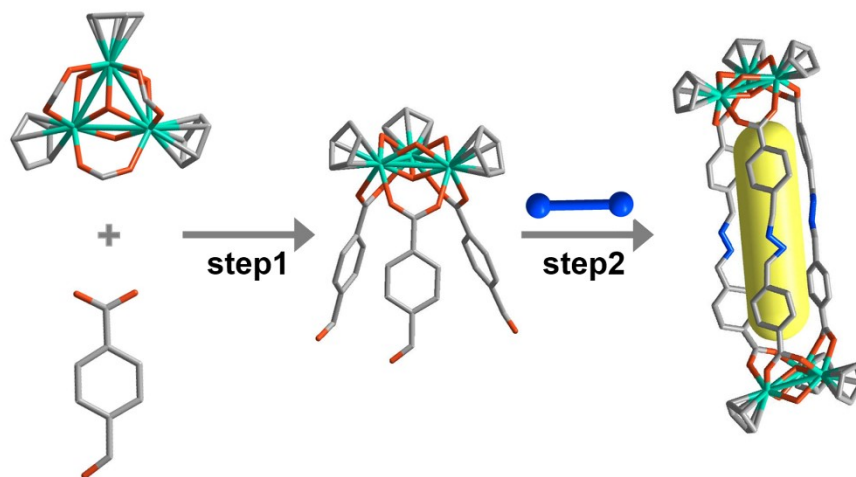

**Fig. S1.** Schematic illustration on synthetic strategy of Schiff-base ZrOC-1.

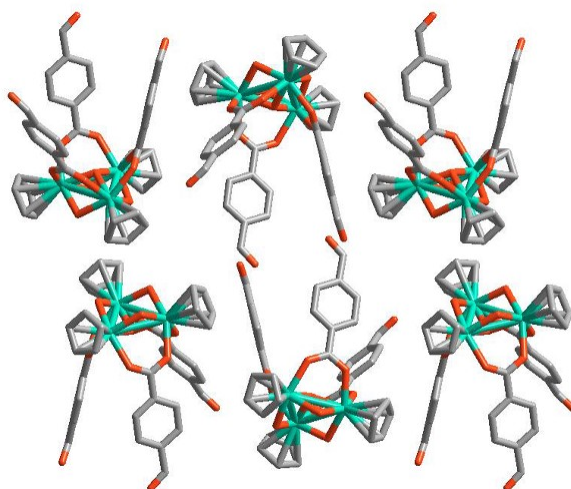

**Fig. S2.** The packing view of Zr-CHO along the a-axis. Color codes: blue-green Zr; black C; red O.

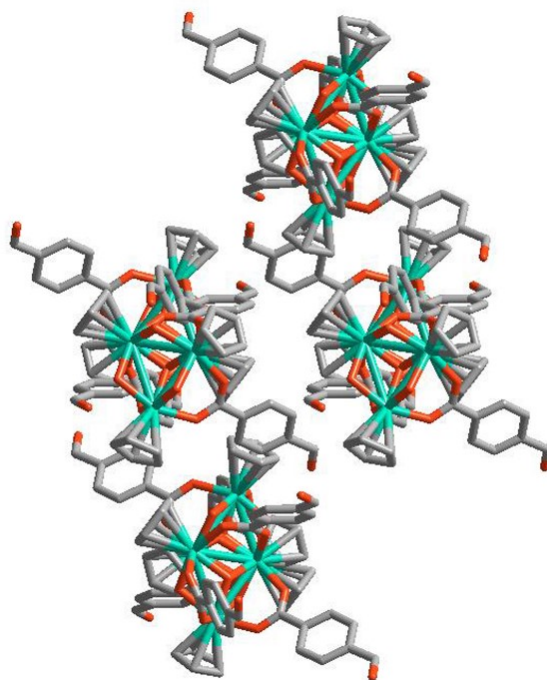

**Fig. S3.** The packing view of Zr-CHO along the b-axis. Color codes: blue-green Zr; black C; red O.

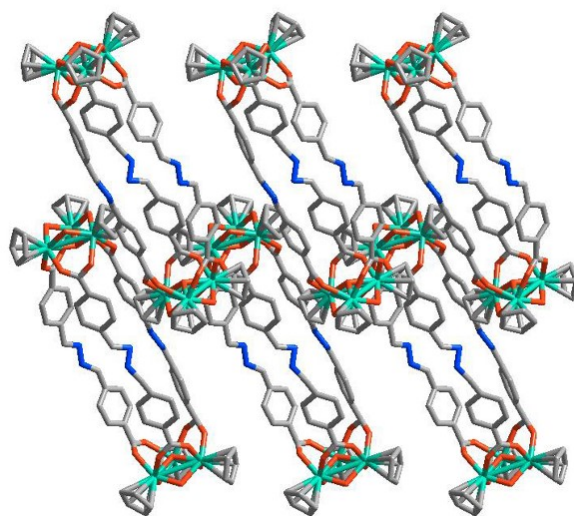

**Fig. S4.** The packing view of Schiff-base ZrOC-1 along the b-axis. Color codes: blue-green Zr; blue N; black C; red O.

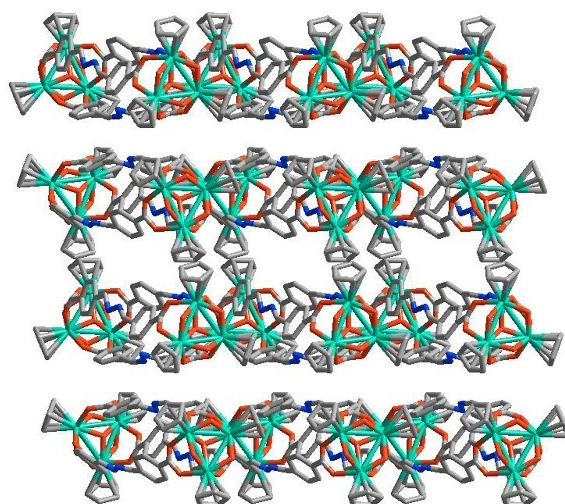

**Fig. S5.** The packing view of Schiff-base ZrOC-1 along the c-axis. Color codes: blue-green Zr; blue N; black C; red O.

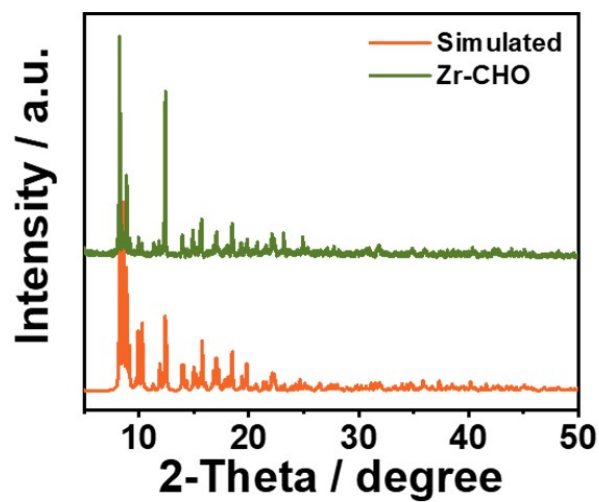

**Fig. S6.** XRD pattern of Zr-CHO.

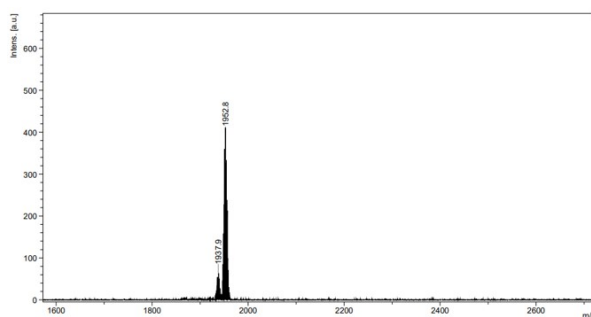

**Fig. S7.** The MS of Schiff-base ZrOC-1.



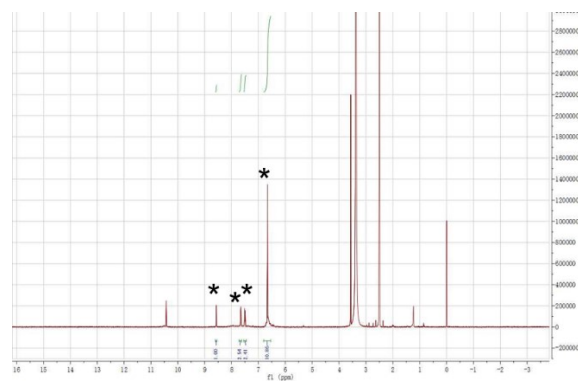

Fig. S8.  $^1\text{H}$  NMR spectrum of Schiff-base ZrOC-1.

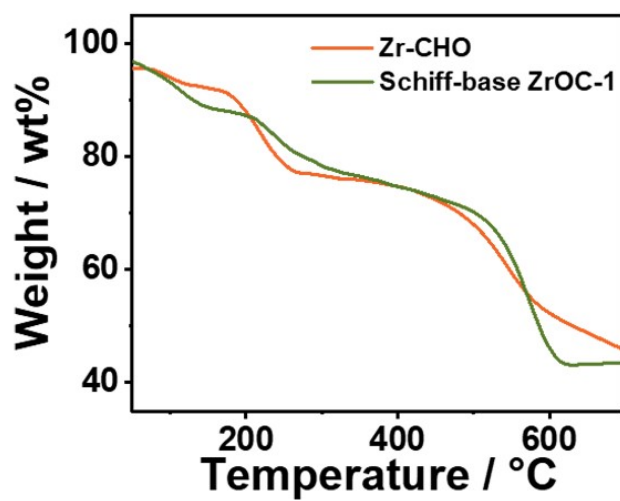

Fig. S9. TGA of Zr-CHO and Schiff-base ZrOC-1.

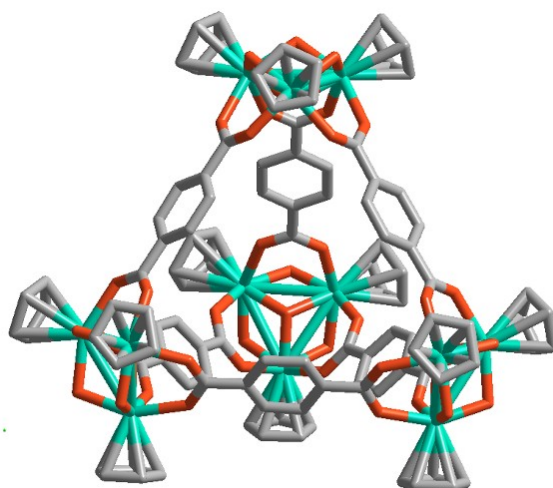

Fig. S10. The cage structure of ZrT-1.

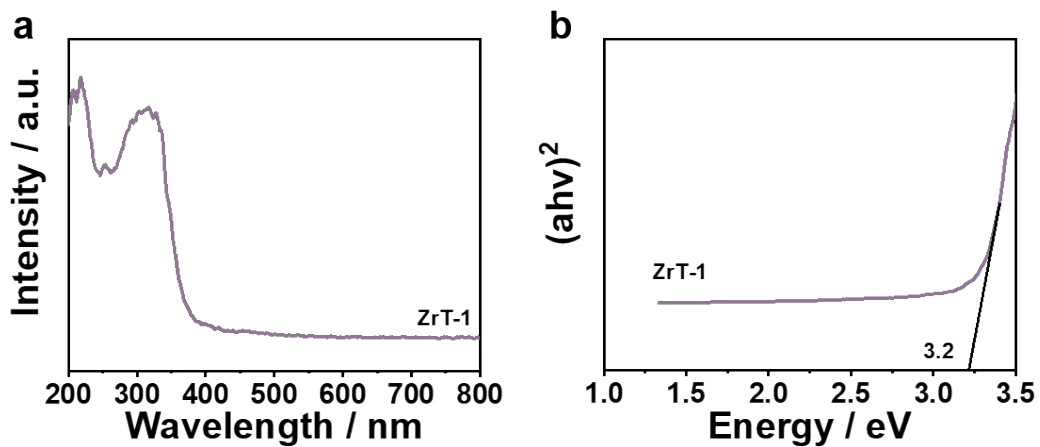

Fig. S11. (a) UV-vis absorption spectrum of ZrT-1. (b) Tauc plot of ZrT-1.

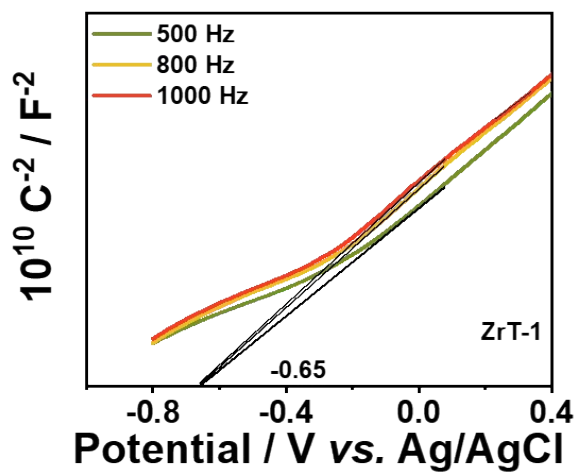

Fig. S12. Mott-Schottky plots of ZrT-1.

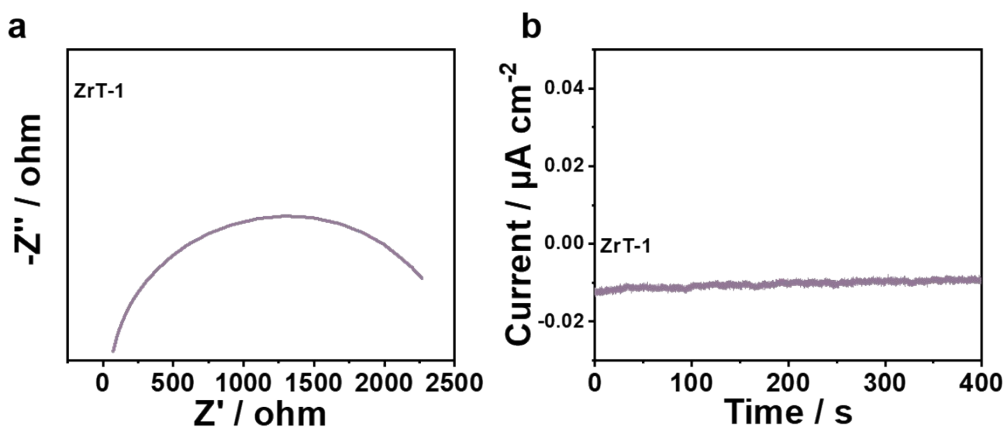

Fig. S13. (a) EIS Nyquist plot of ZrT-1. (b) Transient photocurrent response of ZrT-1.

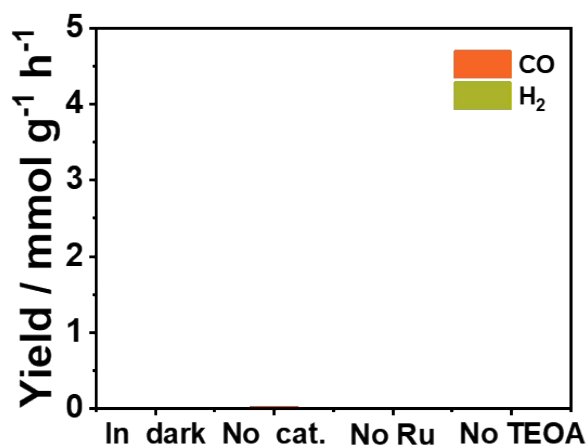

Fig. S14. Photocatalytic performances of Schiff-base ZrOC-1 under different reaction conditions.

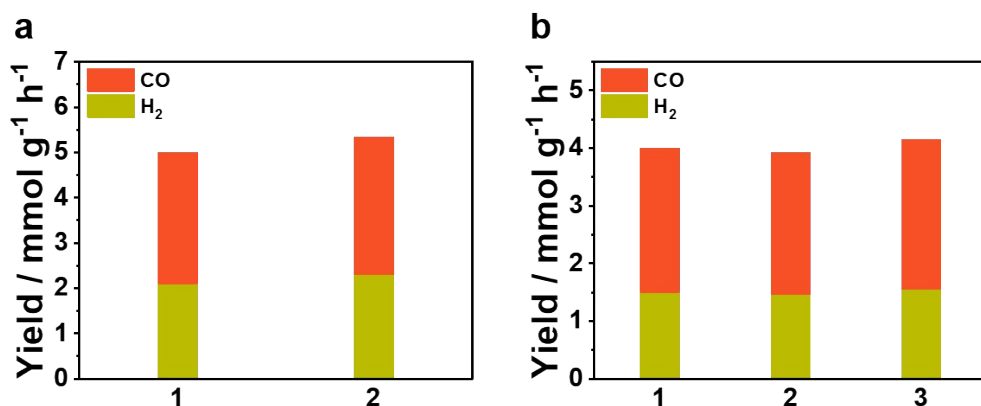

Fig. S15. (a) Yield of reduced product after continued addition of 7 mg Ru(bpy)<sub>3</sub>Cl<sub>2</sub> to the system. (b) Reproducibility experiments with Schiff-base ZrOC-1.

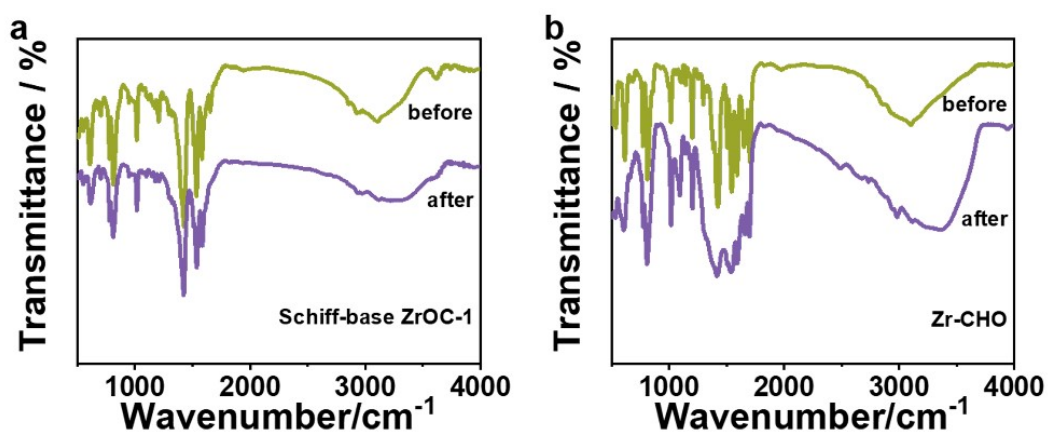

Fig. S16. FT-IR spectra of Schiff-base ZrOC-1 (a) and Zr-CHO (b).

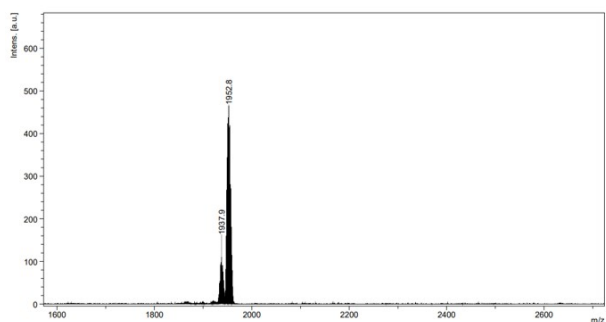

Fig. S17. The MS of Schiff-base ZrOC-1 in TEOA.

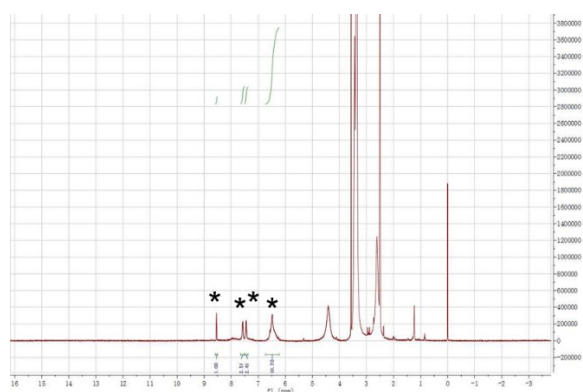

Fig. S18.  $^1\text{H-NMR}$  spectrum of Schiff-base ZrOC-1 in TEOA.

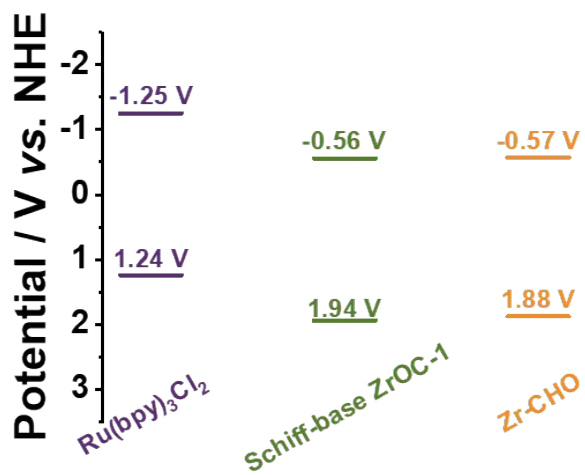

Fig. S19. Band structure diagram for Zr-CHO and Schiff-base ZrOC-1.

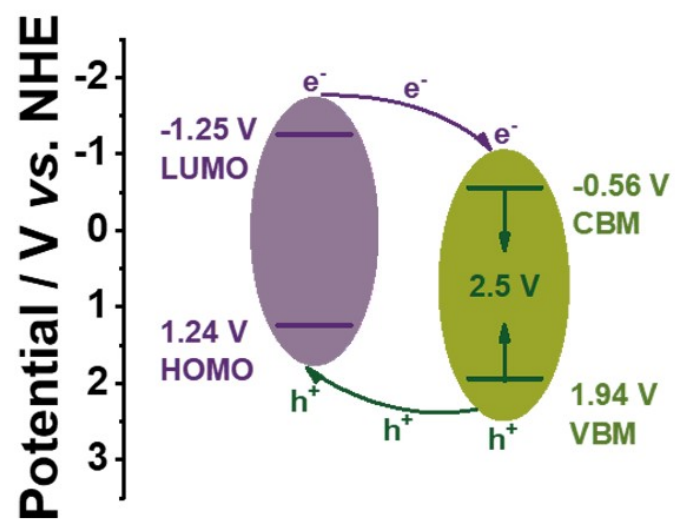

Fig. S20 Possible mechanism of Schiff-base ZrOC-1 for photoreduction of  $\text{CO}_2$ .
